# Supplementary material for: Urinary Bisphenol A Levels during Pregnancy and Risk of Preterm Birth
Source: PubMed Central journal article supplement (PMC4559950; doi:10.1289/ehp.1408126), 2015-03-27
Supplement: ehp.1408126.s001.acco.pdf [file ehp.1408126.s001.acco.pdf]

**Note to Readers:** *EHP* strives to ensure that all journal content is accessible to all readers.

However, some figures and Supplemental Material published in *EHP* articles may not conform to 508 standards due to the complexity of the information being presented. If you need assistance accessing journal content, please contact [ehp508@niehs.nih.gov](mailto:ehp508@niehs.nih.gov). Our staff will work with you to assess and meet your accessibility needs within 3 working days.

## **Supplemental Material**

### **Urinary Bisphenol A Levels during Pregnancy and Risk of Preterm Birth**

David E. Cantonwine, Kelly K. Ferguson, Bhramar Mukherjee, Thomas F. McElrath, and John D. Meeker

#### **Table of Contents**

**Table S1.** Odds ratios (95% confidence intervals) of overall preterm birth in association with quartiles of random BPA slopes and intercepts generated by linear mixed effect models.

**Table S2.** Odds ratios (95% confidence intervals) of combined preterm sub-categories in association with ln-unit increase in BPA concentration (ng/mL).

**Table S1.** Odds ratios (95% confidence intervals) of overall preterm birth in association with quartiles of random BPA slopes and intercepts generated by linear mixed effect models.

| Overall Preterm                                   | Model 1                |                   |      | Model 2 <sup>a</sup>   |                   |      | Model 3 <sup>b</sup>   |                   |      |
|---------------------------------------------------|------------------------|-------------------|------|------------------------|-------------------|------|------------------------|-------------------|------|
|                                                   | N<br>(cases, controls) | OR (95% CI)       | p    | N<br>(cases, controls) | OR (95% CI)       | p    | N<br>(cases, controls) | OR (95% CI)       | p    |
| Random Intercept                                  | 130, 352               | 1.64 (0.73, 3.65) | 0.23 | 127, 334               | 1.56 (0.61, 4.01) | 0.36 | 127, 334               | 1.43 (0.55, 3.70) | 0.46 |
| Quartiled slopes of BPA exposure across pregnancy |                        |                   |      |                        |                   |      |                        |                   |      |
| Quartile 1<br>< -0.000199                         |                        | REF               |      |                        | REF               |      |                        | REF               |      |
| Quartile 2<br>-0.000199 to -0.0000164             |                        | 0.60 (0.33, 1.07) | 0.09 |                        | 0.55 (0.29, 1.05) | 0.07 |                        | 0.54 (0.28, 1.03) | 0.06 |
| Quartile 3<br>-0.0000165 to 0.000174              |                        | 1.01 (0.59, 1.75) | 0.97 |                        | 0.94 (0.52, 1.72) | 0.84 |                        | 0.88 (0.48, 1.63) | 0.68 |
| Quartile 4 $\geq$ 0.000175                        |                        | 0.78 (0.45, 1.37) | 0.39 |                        | 0.81 (0.43, 1.53) | 0.51 |                        | 0.76 (0.40, 1.45) | 0.41 |

<sup>a</sup>Model adjusted for specific gravity, maternal age, race, maternal educational level attained, medical insurance, parity, prior history of PTB, and BMI.

<sup>b</sup>Additional adjustment for geometric average sum of DEHP metabolites.

**Table S2.** Odds ratios (95% confidence intervals) of combined preterm sub-categories in association with ln-unit increase in BPA concentration (ng/mL).

| Spontaneous/Placental PTB               | Model 1 <sup>a</sup>   |                   |      | Model 2 <sup>b</sup>   |                   |       | Model 3 <sup>c</sup>   |                   |      |
|-----------------------------------------|------------------------|-------------------|------|------------------------|-------------------|-------|------------------------|-------------------|------|
|                                         | N<br>(cases, controls) | OR (95% CI)       | p    | N<br>(cases, controls) | OR (95% CI)       | p     | N<br>(cases, controls) | OR (95% CI)       | p    |
| GM Average (Visit 1-3)                  | 91, 352                | 1.52 (1.02, 2.27) | 0.04 | 89, 338                | 1.45 (0.89, 2.37) | 0.13  | 89, 338                | 1.33 (0.81, 2.18) | 0.27 |
| Visit 1                                 | 91, 351                | 1.27 (0.96, 1.67) | 0.09 | 89, 337                | 1.10 (0.81, 1.51) | 0.54  | 89, 337                | 1.05 (0.76, 1.45) | 0.75 |
| Visit 2                                 | 83, 304                | 1.28 (0.95, 1.74) | 0.11 | 81, 295                | 1.35 (0.95, 1.90) | 0.09  | 81, 295                | 1.34 (0.94, 1.91) | 0.10 |
| Visit 3                                 | 79, 301                | 0.95 (0.70, 1.27) | 0.70 | 77, 291                | 0.91 (0.65, 1.28) | 0.59  | 77, 291                | 0.81 (0.56, 1.18) | 0.27 |
| Visit 4                                 | 40, 314                | 1.51 (1.02, 2.22) | 0.04 | 38, 302                | 1.96 (1.23, 3.12) | 0.004 | 38, 302                | 1.80 (1.11, 2.92) | 0.02 |
| Combined Model (Visit 1-3) <sup>d</sup> | 73, 263                |                   |      | 71, 256                |                   |       | 71, 256                |                   |      |
| Visit1                                  |                        | 1.18 (0.83, 1.68) | 0.36 |                        | 1.06 (0.72, 1.58) | 0.76  |                        | 1.05 (0.70, 1.56) | 0.82 |
| Visit2                                  |                        | 1.30 (0.92, 1.83) | 0.14 |                        | 1.43 (0.97, 2.11) | 0.07  |                        | 1.39 (0.93, 2.06) | 0.11 |
| Visit3                                  |                        | 0.89 (0.65, 1.23) | 0.48 |                        | 0.84 (0.59, 1.20) | 0.33  |                        | 0.79 (0.55, 1.14) | 0.21 |

<sup>a</sup>Adjusted for specific gravity. <sup>b</sup>Model adjusted for specific gravity, maternal age, race, maternal educational level attained, medical insurance, parity, prior history of PTB, and BMI. <sup>c</sup>Additional adjustment for geometric average sum of DEHP metabolites. <sup>d</sup>Combined model adjusted for all three study visits simultaneously.
